# Supplementary material for: Noncollinear frustrated antiferromagnetic Mn3P monolayer and its tunability via a spin degree of freedom
Source: Royal Society of Chemistry journal article supplement (doi:10.1039/d0tc02731f), 2020-01-01
Supplement: d0tc02731f1.pdf [file d0tc02731f1.pdf]

## Electronic Supplementary Information

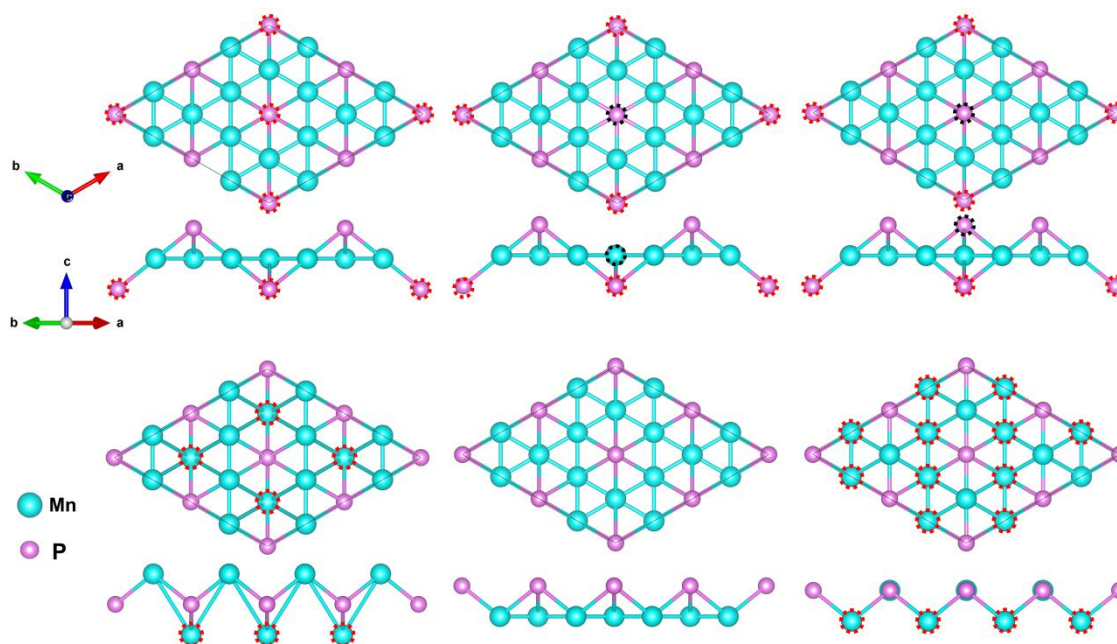

ESI Figure 1 Geometrical structures of bulked 2D  $\text{Mn}_3\text{P}$  monolayer with out-of-plane distortions.

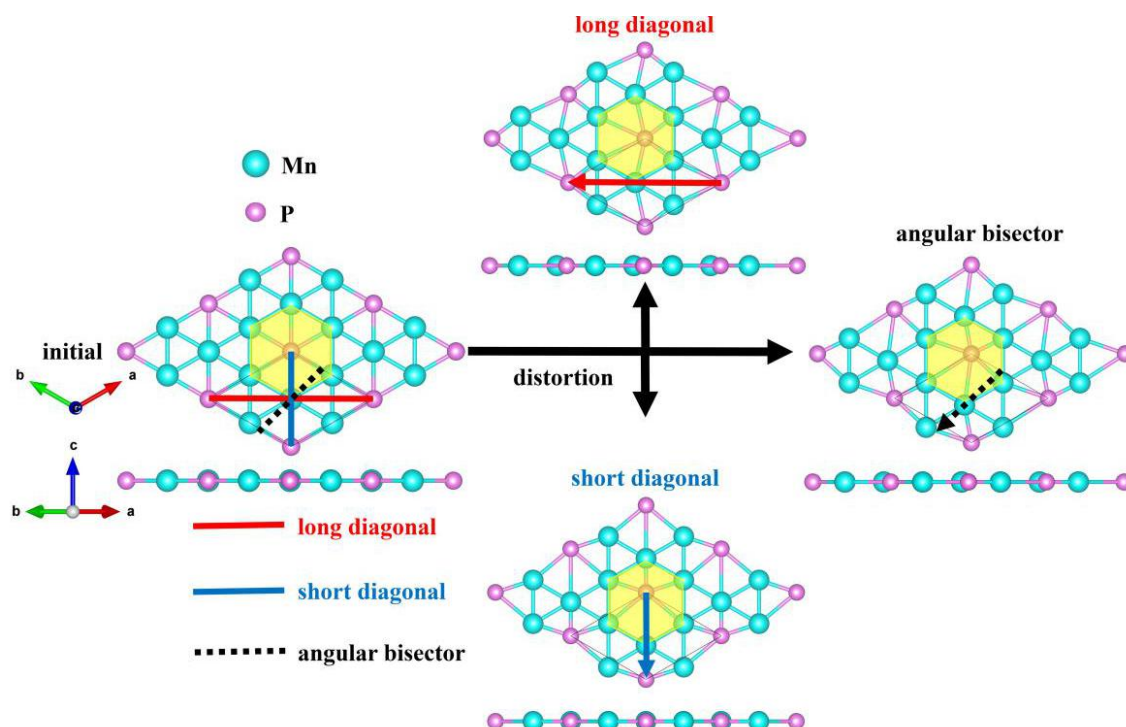

ESI Figure 2 Geometrical structures of 2D  $\text{Mn}_3\text{P}$  monolayer with in-plane distortions, where Mn atoms are shifted with an interval of  $0.1 \text{ \AA}$  along long diagonal, short diagonal, and angular bisector paths indicated in red, blue, and

dashed black arrows, respectively.

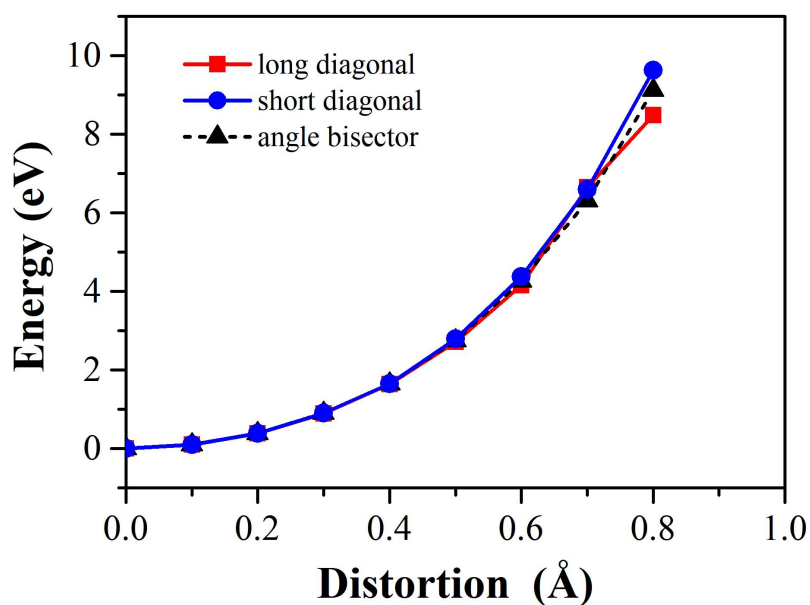

ESI Figure 3 Energies of Mn<sub>3</sub>P monolayer related to in-plane distortions along long diagonal, short diagonal, and angle bisector paths, respectively.

ESI Table 1 Summary of energy differences for different magnetic configurations of distorted Mn<sub>3</sub>P structure obtained from AIMD simulations.

| Material          | Lattice (Å) | Bond (Å) | Magnetic configuration |           |                           | $\Delta E$<br>(meV/cell) |
|-------------------|-------------|----------|------------------------|-----------|---------------------------|--------------------------|
|                   |             |          |                        |           |                           |                          |
| Mn <sub>3</sub> P | 4.60        | 2.30     | FM                     | Parallel  | I) (100)                  | 416.38                   |
|                   |             |          |                        |           | II) (010)                 | 416.42                   |
|                   |             |          |                        |           | III) (001)                | 437.62                   |
|                   |             |          |                        |           | IV) (110)                 | 416.49                   |
|                   |             |          |                        |           | V) (111)                  | 416.25                   |
|                   |             |          | AFM                    | Chirality | VI) rows                  | 232.09                   |
|                   |             |          |                        |           | VII) Positive             | 0                        |
|                   |             |          |                        |           | VIII) Negative            | 8.95                     |
|                   |             |          |                        |           | IX) Positive and Negative | 6.50                     |
